# Supplementary material for: Performance Improvement and Biofouling Mitigation in Osmotic Microbial Fuel Cells via In Situ Formation of Silver Nanoparticles on Forward Osmosis Membrane
Source: MDPI journal article supplement (doi:10.3390/membranes10060122), 2020-06-16
Supplement: s1 [file s1]

## **Cover Page for Supplementary Materials**

### **Manuscript title:**

Performance improvement and biofouling mitigation in osmotic microbial fuel cells via *in situ* formation of silver nanoparticles on forward osmosis membrane

### **Author list:**

Yuqin Lu<sup>1</sup>, Jia Jia<sup>2</sup>, Hengfeng Miao<sup>1</sup>, Wenquan Ruan<sup>1</sup>, Xinhua Wang<sup>1,\*</sup>

<sup>1</sup> Jiangsu Key Laboratory of Anaerobic Biotechnology, School of Environmental and Civil Engineering, Jiangnan University, Wuxi 214122, P.R. China

<sup>2</sup> Zhejiang Province Environmental Engineering Technology Appraisal Center, Hangzhou 310012, P.R. China

\*Corresponding author. E-mail: [xhwang@jiangnan.edu.cn](mailto:xhwang@jiangnan.edu.cn) (X. Wang); Tel: +86-510-85326516.

**Total number of pages (including the cover page): 11 pages**

### **List of Tables and Figures:**

- |               |                                                                                                                                               |
|---------------|-----------------------------------------------------------------------------------------------------------------------------------------------|
| <b>Page 3</b> | <b>Figure S1 Schematic diagram of the OsMFC.</b>                                                                                              |
| <b>Page 4</b> | <b>Table S1 Composition of the synthetic wastewater.</b>                                                                                      |
| <b>Page 5</b> | <b>Table S2 EDX analyses of the pristine and modified active layer of TFC-FO membranes.</b>                                                   |
| <b>Page 6</b> | <b>Figure S2 AFM micrographs (a) and contact angle micrographs (b) of the pristine (1) and modified (2) active layer of TFC-FO membranes.</b> |

|                |                                                                                                                                                                                                 |
|----------------|-------------------------------------------------------------------------------------------------------------------------------------------------------------------------------------------------|
| <b>Page 7</b>  | <b>Figure S3 Water flux of the pristine and modified TFC-FO membranes determined by the FO-Cell using synthetic wastewater as the feed solution and 1 M NaCl solution as the draw solution.</b> |
| <b>Page 8</b>  | <b>Figure S4 CLSM images of bacteria attached to the surface of the pristine (a) and modified (b) TFC-FO membranes.</b>                                                                         |
| <b>Page 9</b>  | <b>Table S3 Properties of the foulants collected from the fouled pristine and modified TFC-FO membranes.</b>                                                                                    |
| <b>Page 10</b> | <b>Figure S5 Integrated CLSM images of polysaccharides (blue), proteins (green) and microorganisms (red) in the biofouling layer of the pristine (a) and modified (b) TFC-FO membranes.</b>     |
| <b>Page 11</b> | <b>Table S4 Biovolume and mean thickness of the pristine and modified TFC-FO membranes.</b>                                                                                                     |

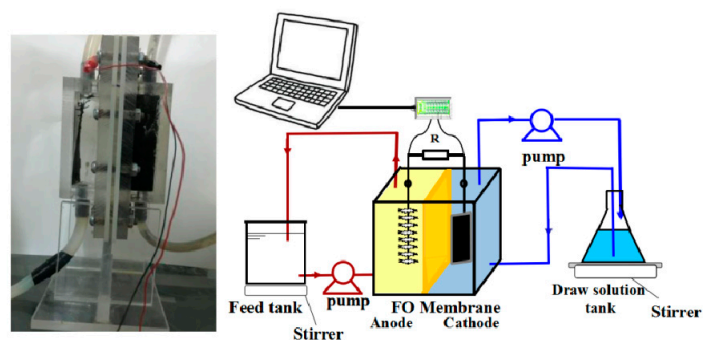

Figure S1 Schematic diagram of the OsMFC.

Table S1 Composition of the synthetic wastewater.

| Composition                               | Concentration (mg/L) |
|-------------------------------------------|----------------------|
| glucose                                   | 230.0                |
| sodium acetate anhydrous                  | 40.0                 |
| peptone form fish                         | 60.0                 |
| beef extract                              | 20.0                 |
| $\text{NH}_4\text{HCO}_3$                 | 170.0                |
| $\text{KH}_2\text{PO}_4$                  | 12.0                 |
| $\text{CaCl}_2$                           | 1.2                  |
| $\text{MgCl}_2 \cdot 6\text{H}_2\text{O}$ | 2.4                  |
| $\text{FeCl}_3 \cdot 6\text{H}_2\text{O}$ | 1.0                  |
| $\text{NaHCO}_3$                          | 198                  |

Table S2 EDX analyses of the pristine and modified active layer of TFC-FO membranes.

| Element | Wt. %             |                   |
|---------|-------------------|-------------------|
|         | Pristine membrane | Modified membrane |
| C       | 79.41             | 77.76             |
| O       | 13.20             | 11.92             |
| S       | 7.39              | 8.18              |
| Ag      | -                 | 2.14              |

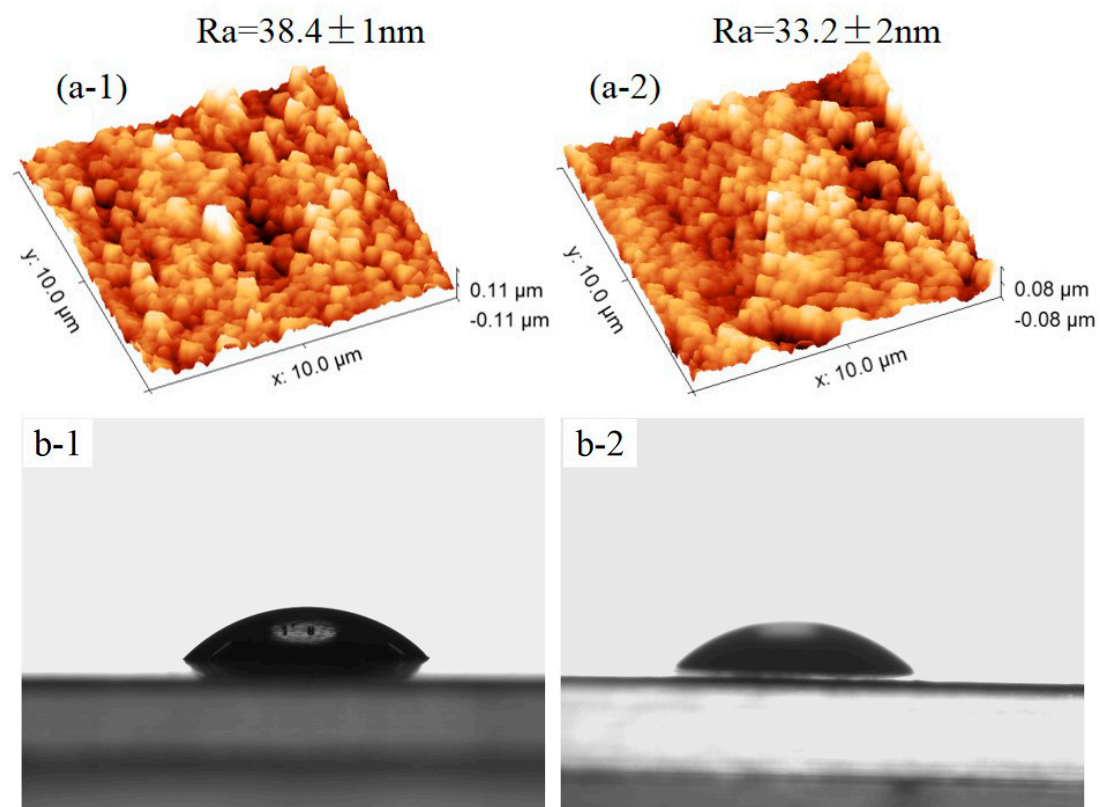

Figure S2 AFM micrographs (a) and contact angle micrographs (b) of the pristine (1) and modified (2) active layer of TFC-FO membranes.

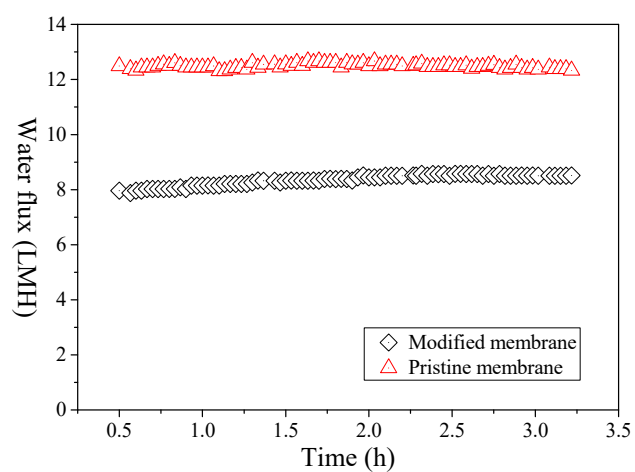

Figure S3 Water flux of the pristine and modified TFC-FO membranes determined by the FO-Cell using synthetic wastewater as the feed solution and 1 M NaCl solution as the draw solution.

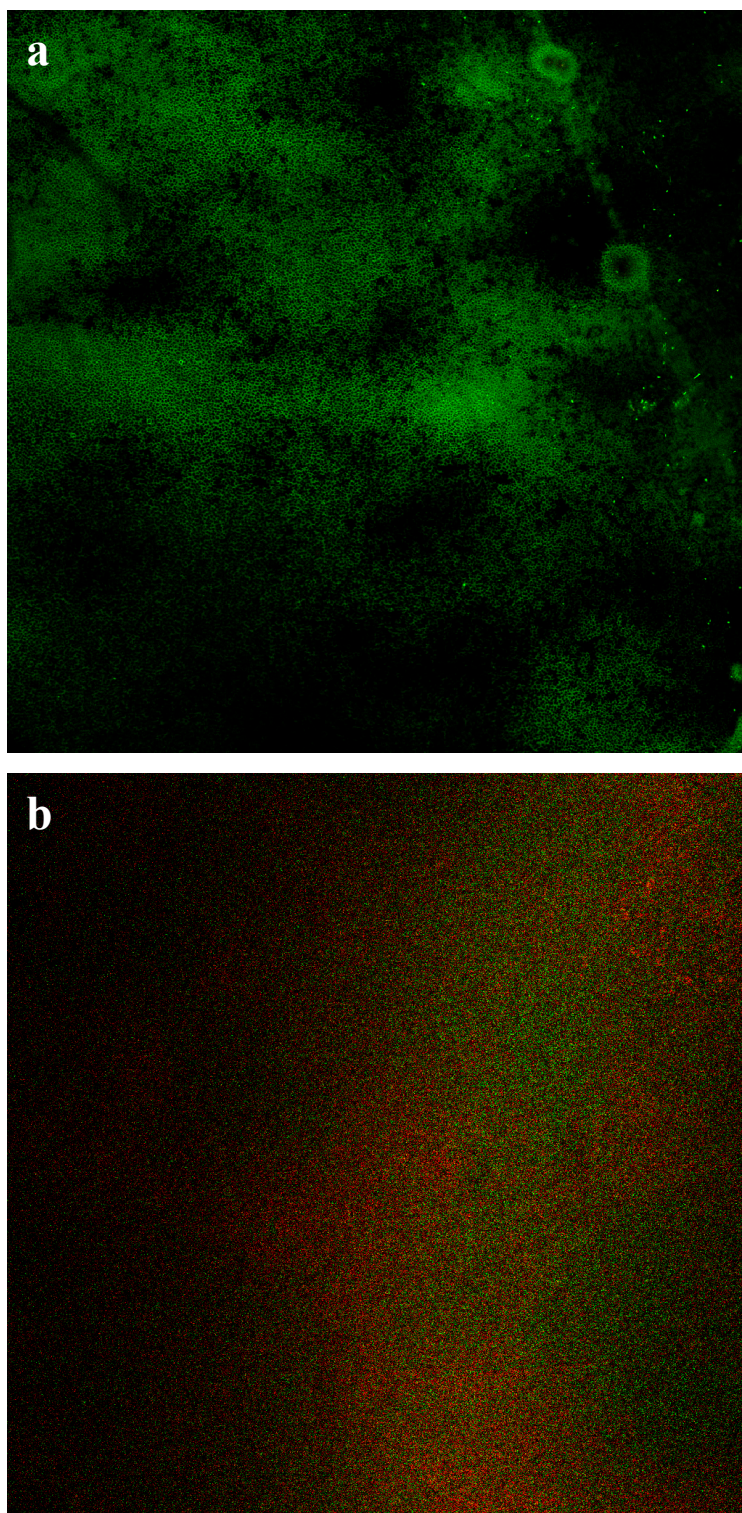

Figure S4 CLSM images of bacteria attached to the surface of the pristine (a) and modified (b) TFC-FO membranes.



Table S3 Properties of the foulants collected from the fouled pristine and modified TFC-FO membranes<sup>a</sup>.

| Index                      | Pristine membrane | Modified membrane |
|----------------------------|-------------------|-------------------|
| MLSS (mg/m <sup>2</sup> )  | 32.0 ± 1.5        | 27.2 ± 1.2        |
| MLVSS (mg/m <sup>2</sup> ) | 28.8 ± 1.8        | 24.0 ± 1.1        |
| MLVSS/MLSS                 | 0.90 ± 0.08       | 0.88 ± 0.07       |

<sup>a</sup> Values are given as mean values ± standard deviation (number of measurements: n = 3).

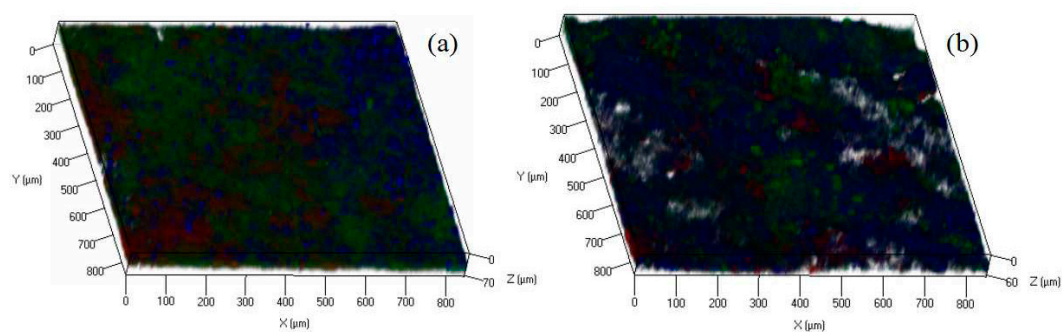

Figure S5 Integrated CLSM images of polysaccharides (blue), proteins (green) and microorganisms (red) in the biofouling layer of the pristine (a) and modified (b) TFC-FO membranes.

Table S4 Biovolume and mean thickness of the pristine and modified TFC-FO membranes<sup>a</sup>.

| Components                                     | Membrane Type     | $\alpha$ -D-Glucopyranose | $\beta$ -D-Glucopyranose | Proteins         | Total cells      |
|------------------------------------------------|-------------------|---------------------------|--------------------------|------------------|------------------|
| Biovolume<br>( $\mu\text{m}^3/\mu\text{m}^2$ ) | Pristine membrane | $1.99 \pm 1.68$           | $11.53 \pm 0.18$         | $20.54 \pm 0.10$ | $15.44 \pm 6.38$ |
|                                                | Modified membrane | $0.03 \pm 0.04$           | $11.95 \pm 0.26$         | $15.08 \pm 0.08$ | $9.67 \pm 0.66$  |
| Mean thickness<br>(mm)                         | Pristine membrane | $28.62 \pm 1.78$          | $31.86 \pm 0.56$         | $38.31 \pm 0.91$ | $36.37 \pm 1.41$ |
|                                                | Modified membrane | $26.43 \pm 2.62$          | $33.98 \pm 1.70$         | $36.95 \pm 2.57$ | $39.63 \pm 0.06$ |

<sup>a</sup> Values are given as mean values  $\pm$  standard deviation (number of measurements: n = 3).
